# Supplementary material for: Potassium niobate nanostructures: controllable morphology, growth mechanism, and photocatalytic activity
Source: Royal Society of Chemistry journal article supplement (doi:10.1039/c2ta01056a), 2013-01-01
Supplement: c2ta01056a.pdf [file c2ta01056a.pdf]

## Supporting Information

For

### Potassium Niobate Nanostructures: Controllable Morphology, Growth Mechanism, and Photocatalytic Activity

Linqin Jiang,<sup>a</sup> Yu Qiu,<sup>b</sup> and Zhiguo Yi<sup>a,\*</sup>

<sup>a</sup>Key Laboratory of Optoelectronic Materials Chemistry and Physics, Fujian Institute of Research on the Structure of Matter, Chinese Academy of Sciences, Fuzhou 350002, China

<sup>b</sup>New Energy Technology Center, Shanghai Institute of Microsystem and Information Technology, Chinese Academy of Sciences, Shanghai 201807, China.

#### **Corresponding Author**

\*Email: [zhiguo@fjirsm.ac.cn](mailto:zhiguo@fjirsm.ac.cn). Tel: 86-591-83806523. Fax: 86-591-83714946.

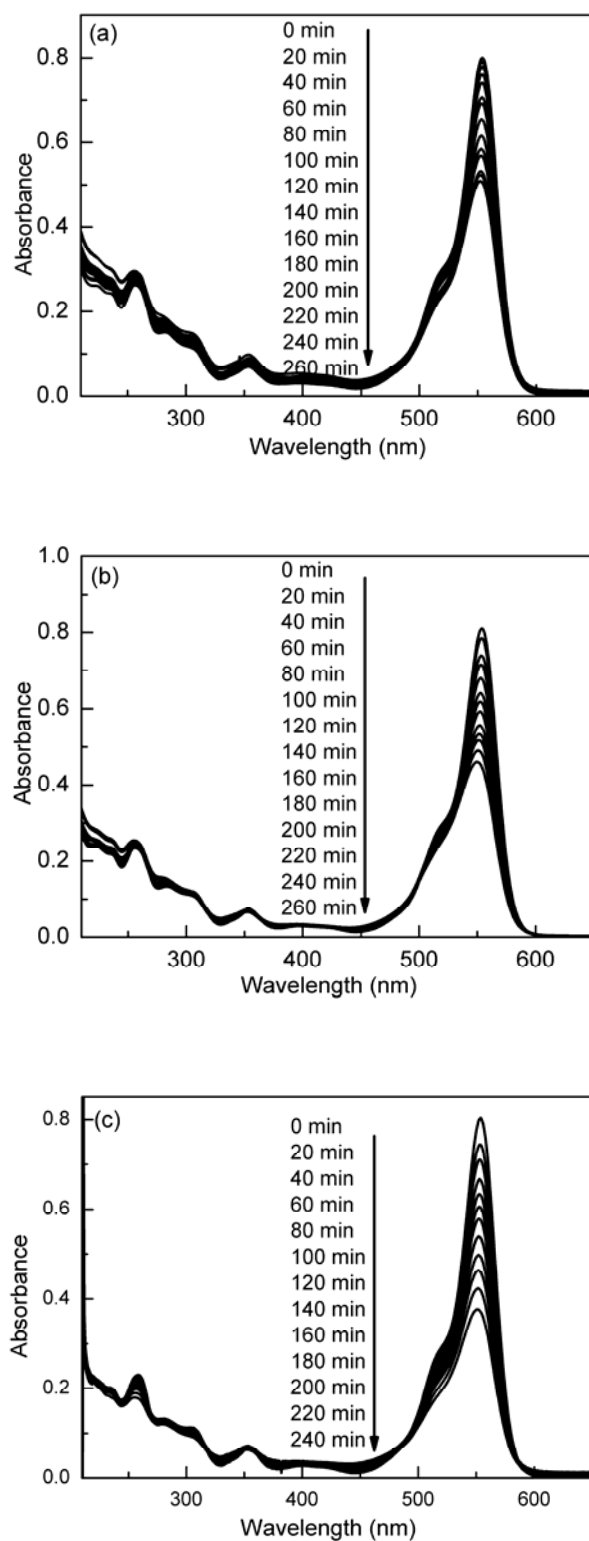

**Figure S1.** UV-vis spectral changes of RhB as a function of irradiation time catalyzed by  $\text{KNbO}_3$  nanotowers synthesized at (a) 150 °C, (b) 200 °C and (c) nanorods synthesized at 250 °C.

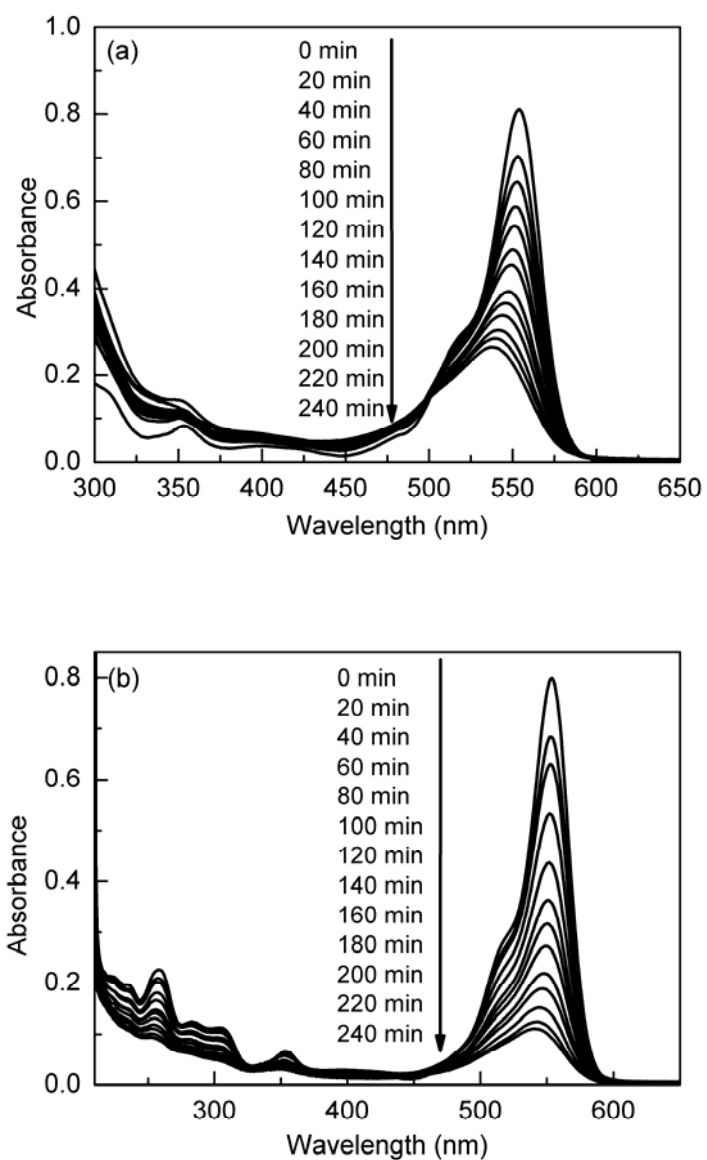

**Figure S2.** UV-vis spectral changes of RhB as a function of irradiation time catalyzed by (a) KNbO<sub>3</sub> nanowires and (b) KNbO<sub>3</sub> nanocubes.

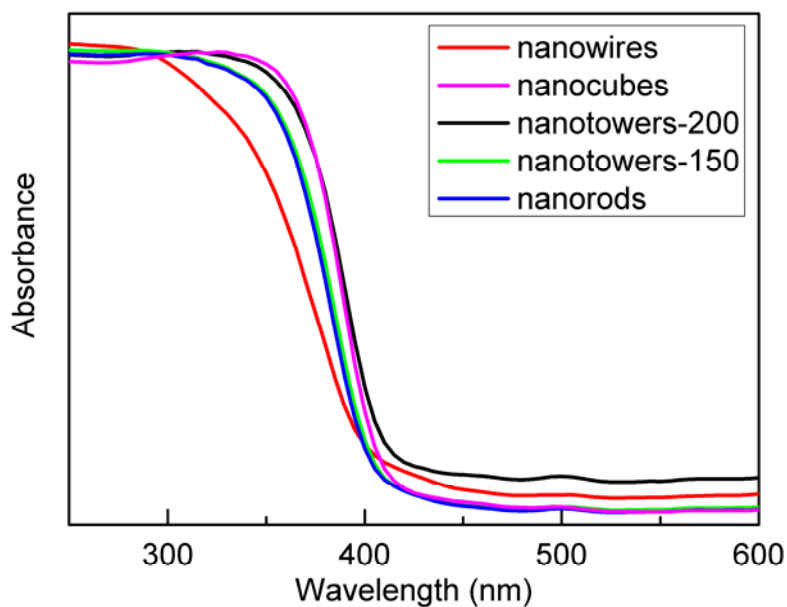

**Figure S3.** UV-vis diffuse reflectance spectra of various KNbO<sub>3</sub> nanostructures.

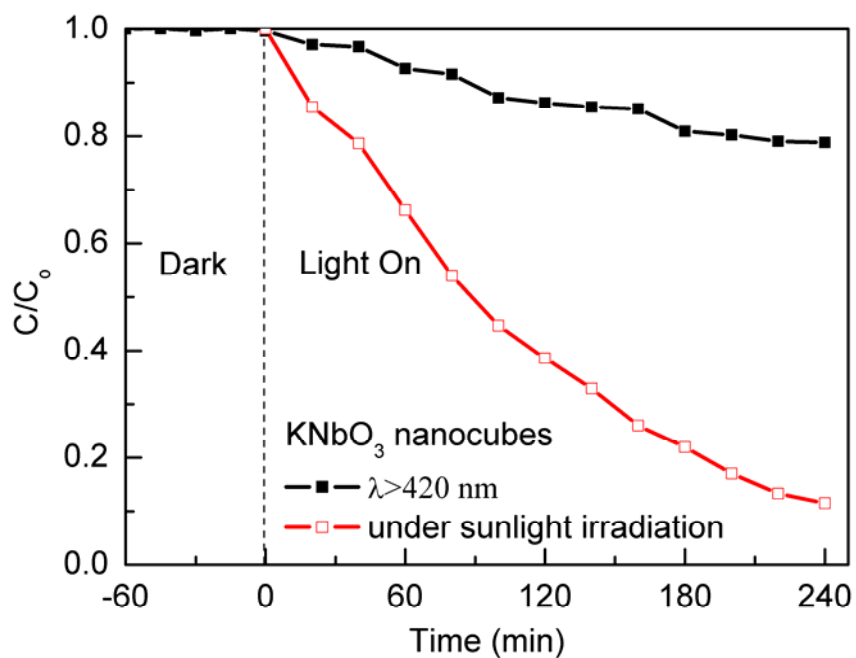

**Figure S4.** Adsorption (dark zone), photosensitization ( $\lambda > 420$  nm) as well as intrinsic photocatalytic effects in RhB degradation upon the KNbO<sub>3</sub> nanocubes.
